# Supplementary material
Source: PubMed Central journal article supplement (PMC4419865)
Supplement: NIHMS684507-supplement-1.pdf [file NIHMS684507-supplement-1.pdf]

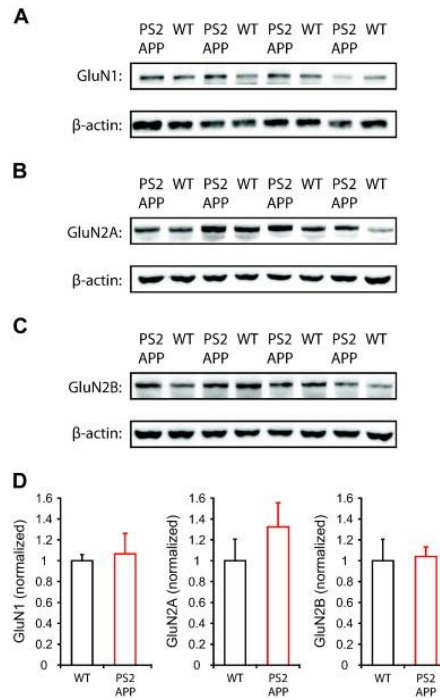

Supplemental Fig. 1 NMDAR subunit expression is normal in PS2APP mice. (A–C) Images of Western blots used for analysis of GluN1, GluN2A, and GluN2B subunits, respectively. In each case β-actin from the same gel that was probed for the NMDAR subunit is show...

Jesse E. Hanson , Jean-Francois Pare , Lunbin Deng , Yoland Smith , Qiang Zhou

**Altered GluN2B NMDA receptor function and synaptic plasticity during early pathology in the PS2APP mouse model of Alzheimer's disease**

Neurobiology of Disease, Volume 74, 2015, 254 - 262

<http://dx.doi.org/10.1016/j.nbd.2014.11.017>

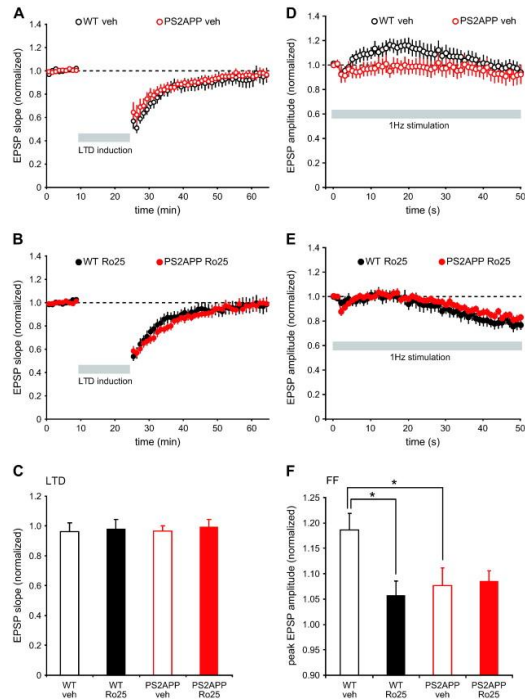

Supplemental Fig. 2 PS2APP mice do not exhibit altered responses to a subthreshold LTD induction protocol, but have impaired FF which occludes the Ro25 impairment of FF observed in wt mice. (A) The LTD induction protocol of paired stimuli (200 ms interval)...

Jesse E. Hanson , Jean-Francois Pare , Lunbin Deng , Yoland Smith , Qiang Zhou

**Altered GluN2B NMDA receptor function and synaptic plasticity during early pathology in the PS2APP mouse model of Alzheimer's disease**

Neurobiology of Disease, Volume 74, 2015, 254 - 262

<http://dx.doi.org/10.1016/j.nbd.2014.11.017>

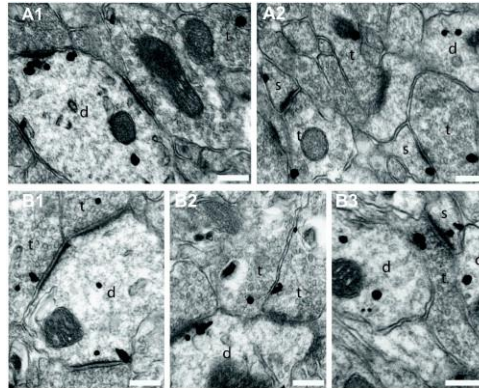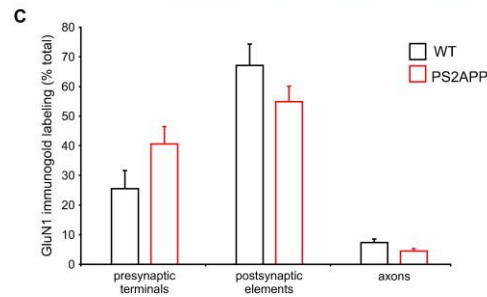

Supplemental Fig. 3 Electron microscopy distribution of GluN1 immunogold labeling in wt and PS2APP mice. (A) Representative micrographs showing GluN1 immunogold labeling in wt mice. Labeled dendrites (d), spines (s) and presynaptic terminals (t) are indicated.

Jesse E. Hanson , Jean-Francois Pare , Lunbin Deng , Yolanda Smith , Qiang Zhou

**Altered GluN2B NMDA receptor function and synaptic plasticity during early pathology in the PS2APP mouse model of Alzheimer's disease**

Neurobiology of Disease, Volume 74, 2015, 254 - 262

<http://dx.doi.org/10.1016/j.nbd.2014.11.017>
